# Supplementary figures and images for: Improving the mass transport of copper-complex redox mediators in dye-sensitized solar cells by reducing the inter-electrode distance
Source: Royal Society of Chemistry journal article supplement (doi:10.1039/c7cp06088b), 2017-01-01

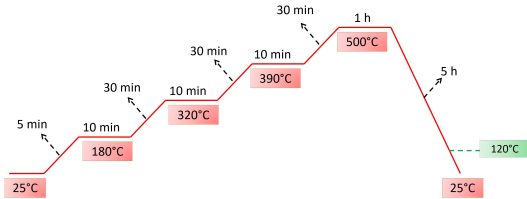

Supplement: c7cp06088b3.pdf [file c7cp06088b3.pdf]

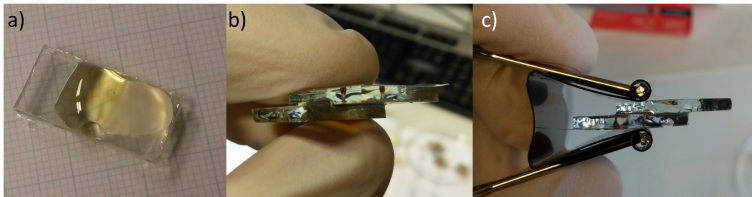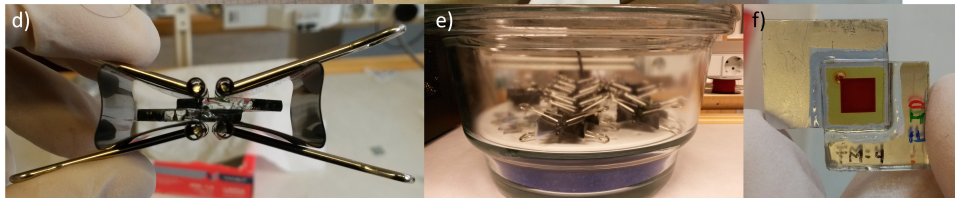

Supplement: c7cp06088b4.pdf [file c7cp06088b4.pdf]

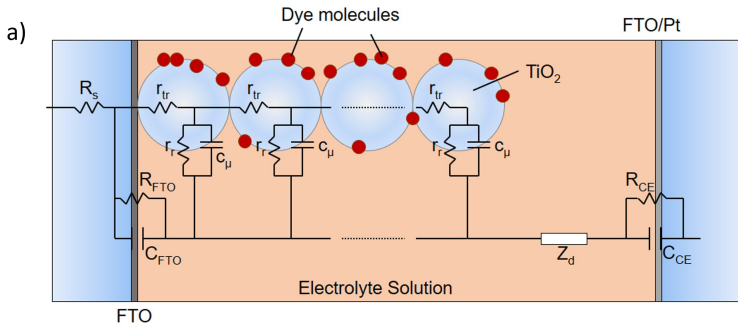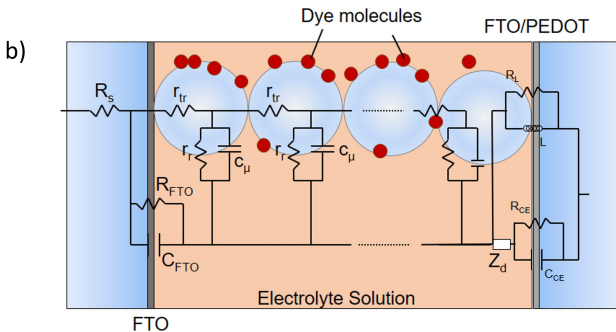

Supplement: c7cp06088b5.pdf [file c7cp06088b5.pdf]

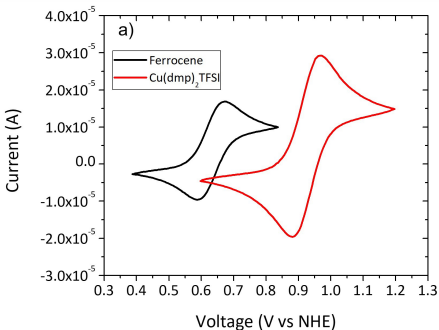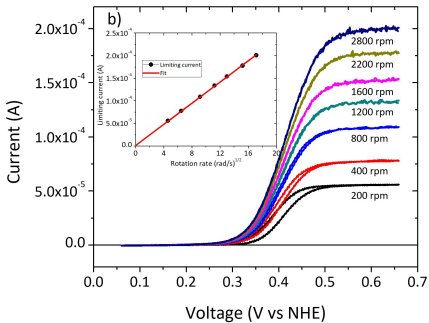

Supplement: c7cp06088b6.pdf [file c7cp06088b6.pdf]

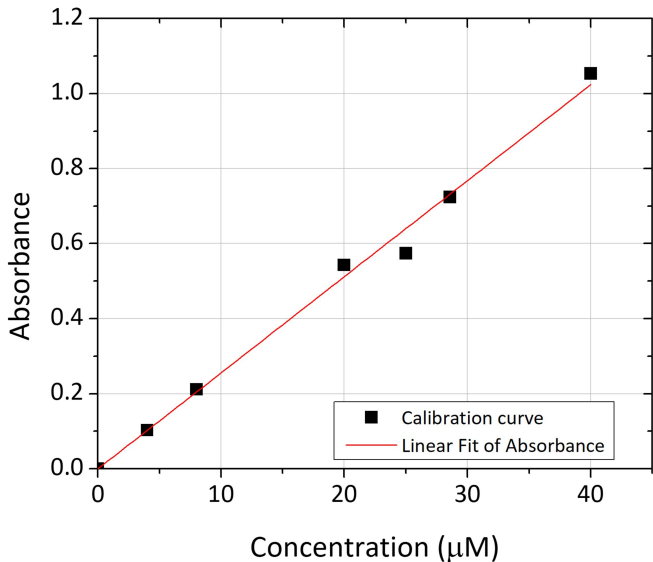

Supplement: c7cp06088b7.pdf [file c7cp06088b7.pdf]

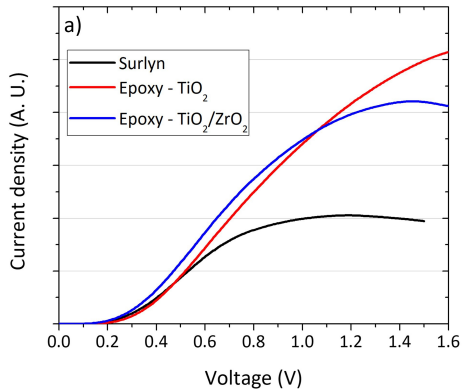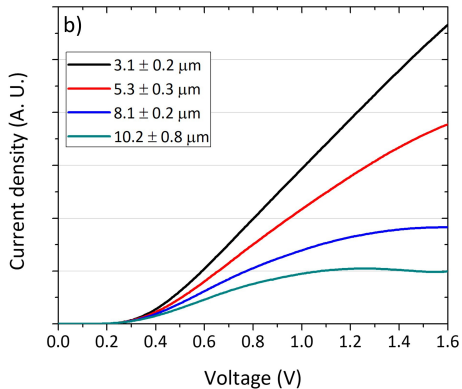

Supplement: c7cp06088b8.pdf [file c7cp06088b8.pdf]

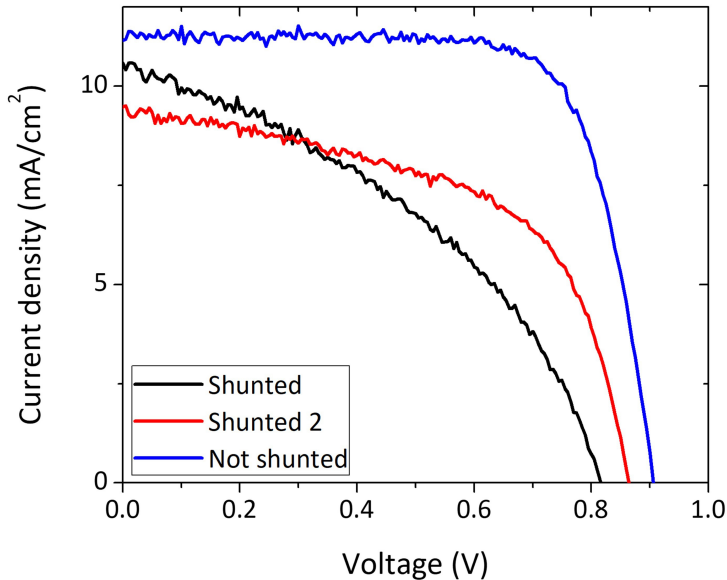

Supplement: c7cp06088b9.pdf [file c7cp06088b9.pdf]
